# Supplementary material for: Addition of anti-CD38 monoclonal antibody in newly diagnosed multiple myeloma: Advancing toward quadruplet induction regimens? A Systematic Review and Meta-Analysis
Source: Research Square preprint supplement (doi:10.21203/rs.3.rs-5411786/v1), 2024-12-10
Supplement: Supplementary file 1 [file 283907480581736da458e8fd.docx]

**Supplement 1**

**Detailed search strategies in PubMed, Web of Science, the** **Cochrane Library, Scopus and Embase.**

PubMed:

#1

("multiple myeloma"[MeSH Terms]) OR (multiple myeloma)OR ((Multiple Myelomas) OR(Myelomas, Multiple) OR(Myeloma, Multiple) OR(Myeloma, Plasma-Cell) OR(Myeloma, Plasma Cell) OR(Myelomas, Plasma-Cell) OR(Plasma-Cell Myeloma) OR(Plasma-Cell Myelomas) OR(Myelomatosis) OR(Myelomatoses) OR(Plasma Cell Myeloma) OR(Cell Myeloma, Plasma) OR(Cell Myelomas, Plasma) OR(Myelomas, Plasma Cell) OR(Plasma Cell Myelomas) OR(Kahler Disease) OR(Disease, Kahler) OR(Myeloma-Multiple) OR(Myeloma Multiple) OR(Myeloma-Multiples))

#2

("daratumumab"[MeSH Terms])OR(daratumumab)OR(humax-CD38) OR(humax-CD 38) OR(Darzalex) OR （"isatuximab" [MeSH Terms]）OR（isatuximab）OR(Sarclisa) OR （isatuximab-irfc）OR（SAR650984）OR(SAR6 50984) OR (Anti-CD38 antibody) OR（Anti-CD38 mab）

#3

newly diagnosed [Title/Abstract]

#4

#1 AND #2 AND #3

Web of Science (WOS):

#1

TS=(multiple myeloma OR (multiple AND myeloma) OR myeloma OR myelomas)

#2

TS=(daratumumab OR humax-CD38 OR Darzalex OR isatuximab OR Sarclisa OR SAR650984 OR Anti-CD38 antibody)

#3

TS=(newly diagnosed)

#4

#1 AND #2 AND #3

Cochrane:

#1

MeSH descriptor: [Multiple Myeloma] explode all trees

#2

(multiple myeloma OR myeloma OR myelomas): ti, ab, kw

#3

(daratumumab OR humax-CD38 OR Darzalex OR isatuximab OR Sarclisa OR SAR650984 OR Anti-CD38 antibody): ti, ab, kw

#4

(newly diagnosed):ti,ab,kw

#5

#1 AND #2 AND #3 AND #4

Scopus:

#1

TITLE-ABS-KEY(multiple myeloma OR Plasma Cell Myeloma OR Kahler Disease)

#2

TITLE-ABS-KEY(daratumumab OR humax-CD38 OR Darzalex OR isatuximab OR Sarclisa OR SAR650984 OR Anti-CD38 antibody)

#3

TITLE-ABS-KEY(newly diagnosed)

#4

#1 AND #2 AND #3

Embase:

#1

('kahler disease'/exp OR 'kahler disease' OR 'morbus kahler'/exp OR 'morbus kahler' OR 'myeloma multiplex'/exp OR 'myeloma multiplex' OR 'myeloma, multiple'/exp OR 'myeloma, multiple' OR 'myelomatosis'/exp OR 'myelomatosis' OR 'plasma cell myeloma'/exp OR 'plasma cell myeloma' OR 'multiple myeloma'/exp OR 'multiple myeloma') AND [clinical study]/lim

#2

'dalinvi' OR 'darasarex' OR 'darzalex' OR 'hlx 15' OR 'hlx15' OR 'humax CD38' OR 'jnj 54767414' OR 'jnj54767414' OR 'monoclonal antibody humax CD38' OR 'daratumumab' OR 'hu38sb19' OR 'isatuximab irfc' OR 'isatuximab-irfc' OR 'sar 650984' OR 'sar650984' OR 'sarclisa' OR 'isatuximab' OR ‘Anti-CD38 antibody’ AND [clinical study]/lim

#3

'newly diagnosed' AND [clinical study]/lim

#4

#1 AND #2 AND #3
