# Supplementary material for: Addition of anti-CD38 monoclonal antibody in newly diagnosed multiple myeloma: Advancing toward quadruplet induction regimens? A Systematic Review and Meta-Analysis
Source: Research Square preprint supplement (doi:10.21203/rs.3.rs-5411786/v1), 2024-12-10
Supplement: Supplementary file 3 [file 6b6808bac9b5ba0f12ea6a26.docx]

**Supplement 2**


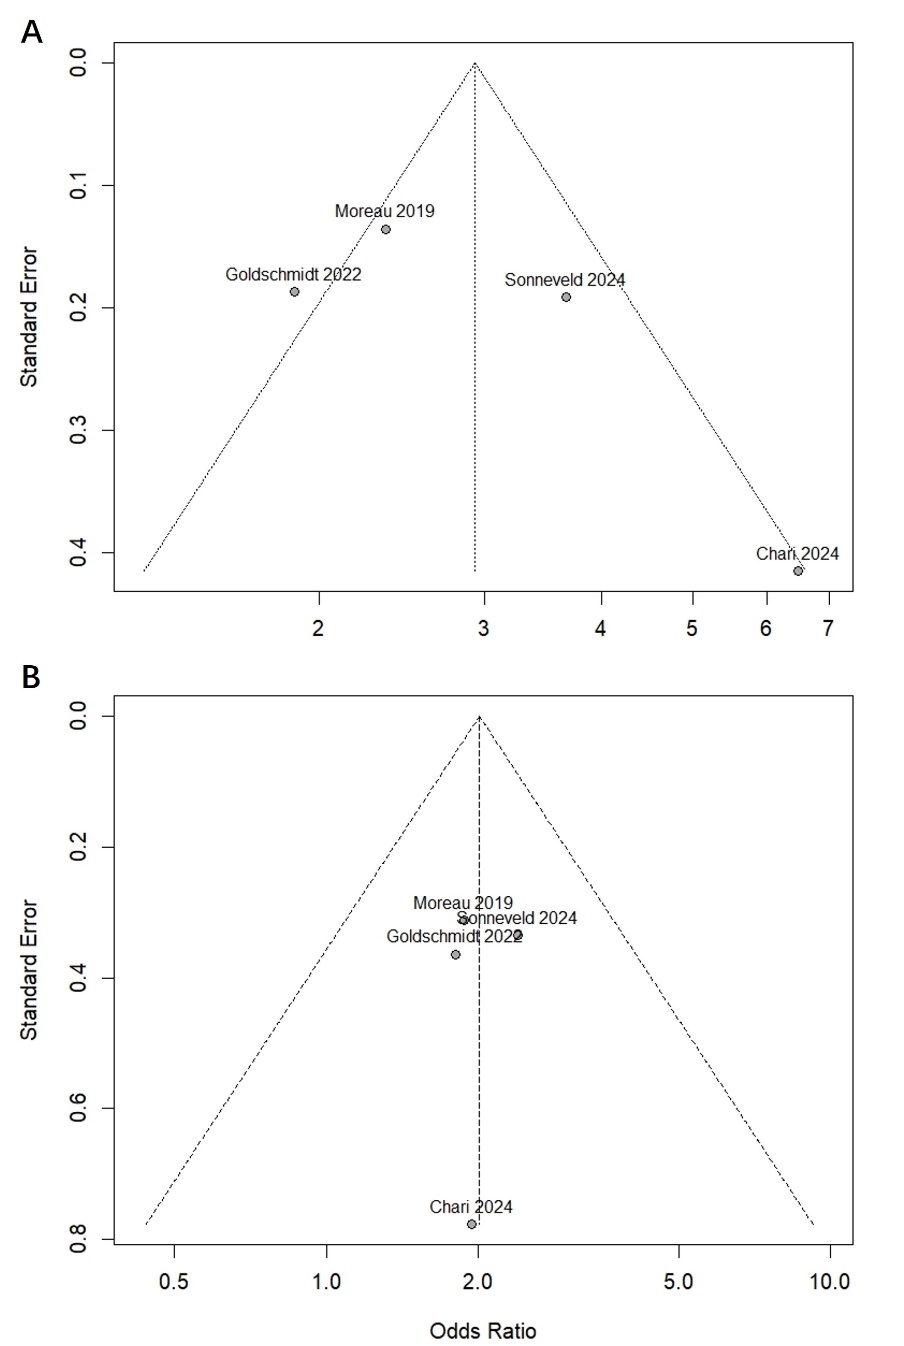


**Figure 1**. The funnel plot of MRD-negativity status rate by subgroups of **(A)** SRMM and **(B)**HRMM.


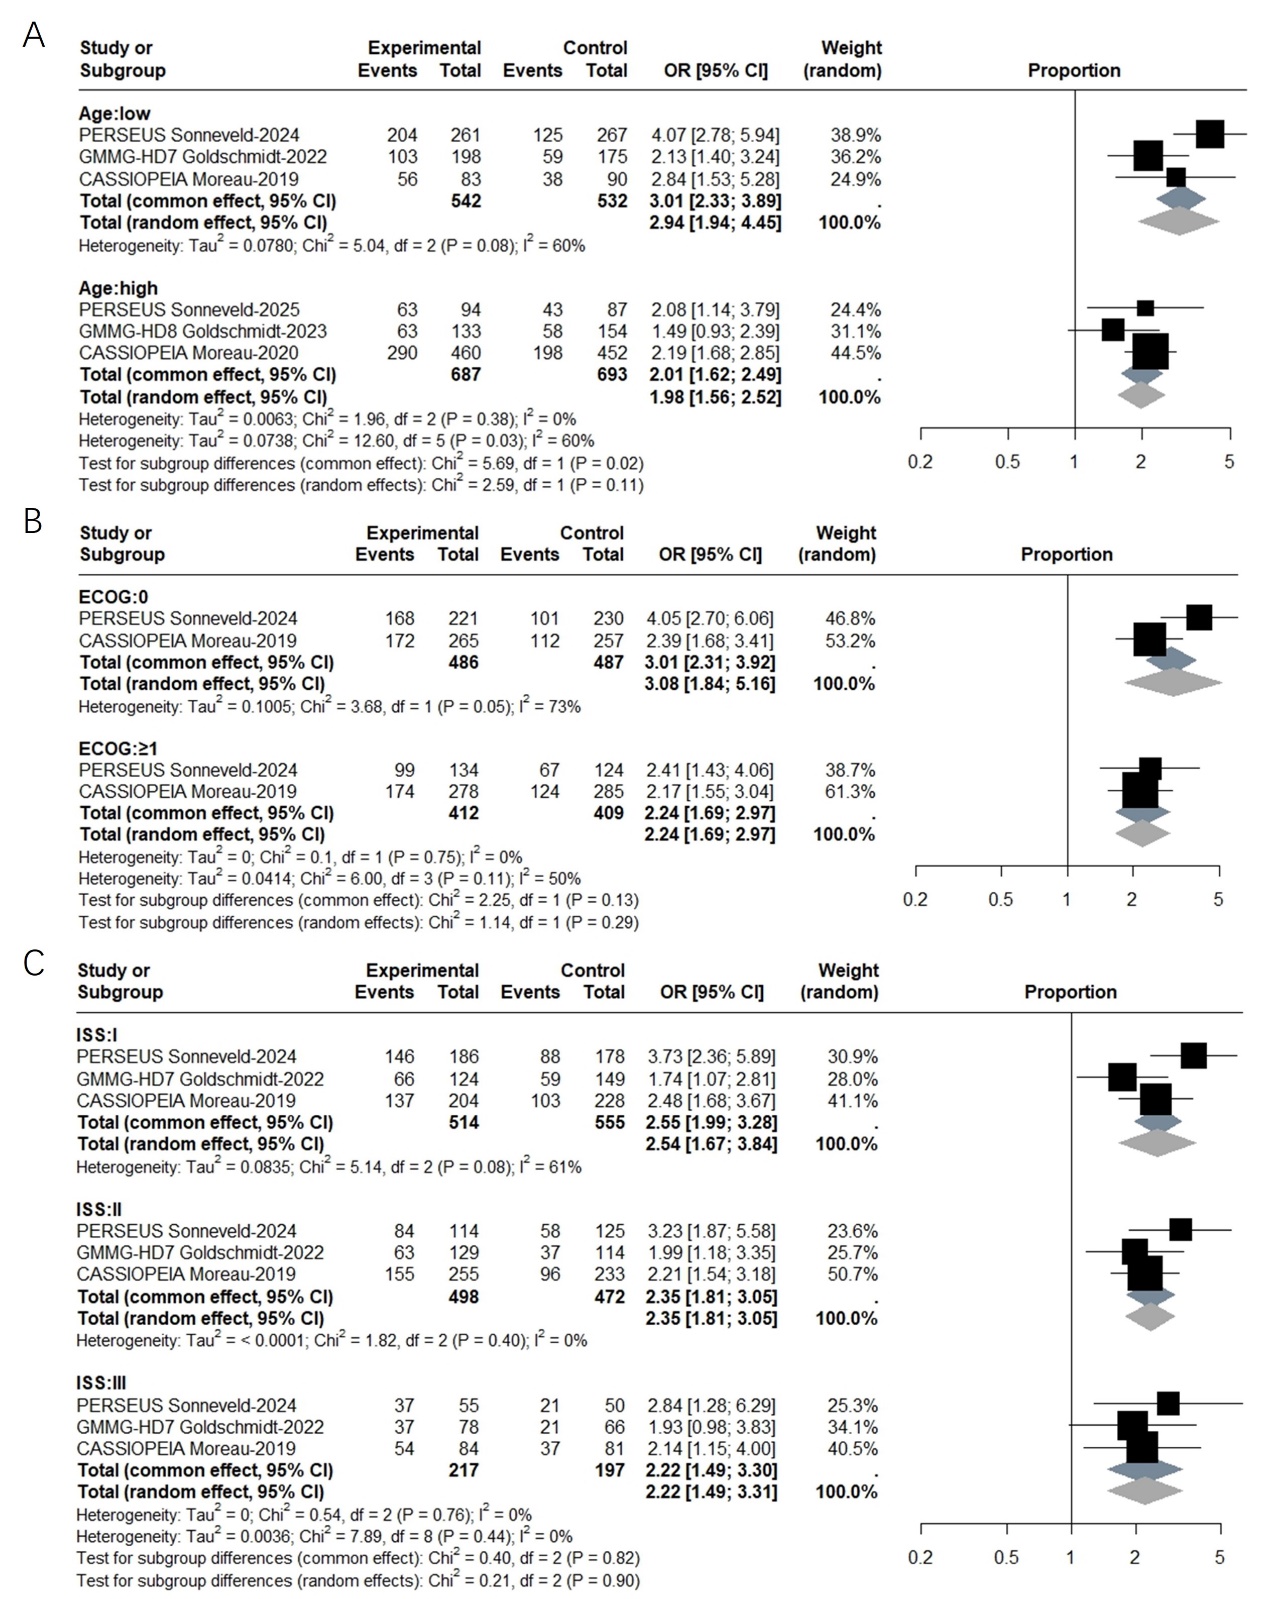


**Figure 2.** The meta-analysis of MRD-negativity status rate for TE NDMM by subgroups of **(A)** different age groups, **(B)**performance statuses, and **(C)**International Staging System (ISS) stages.


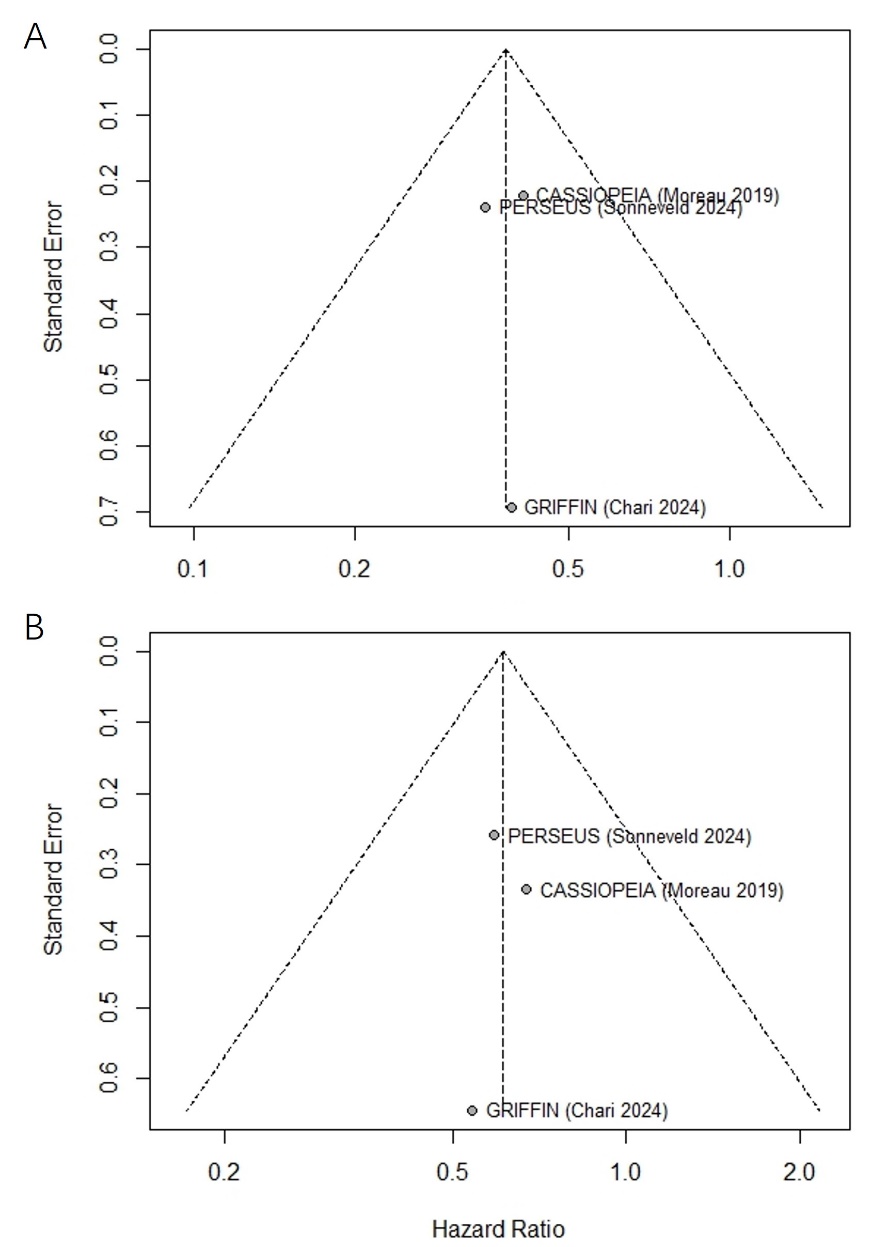


**Figure 3**. The funnel plot of PFS for TE-NDMM by subgroups of **(A)** SRMM and**(B)** HRMM.


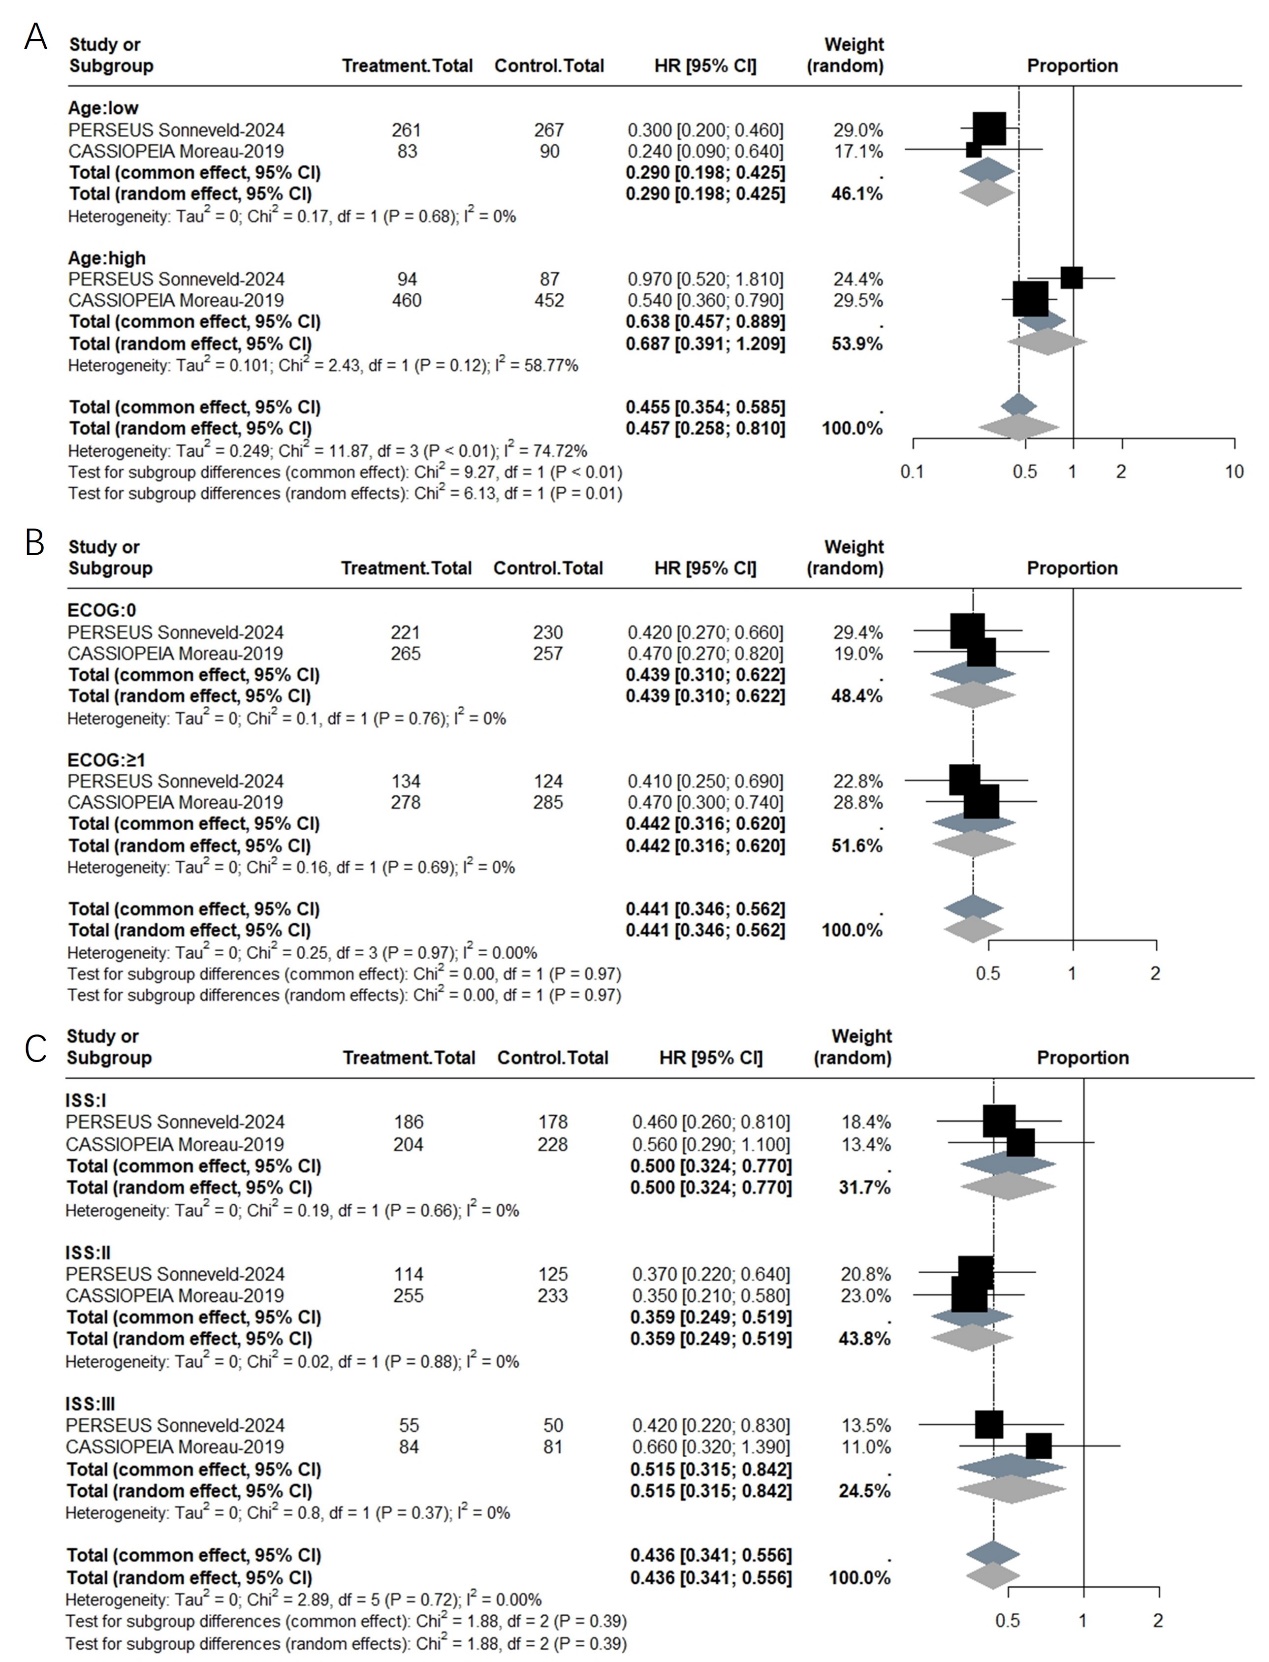


**Figure 4.** The meta-analysis of PFS for TE NDMM by subgroups of **(A)** different age groups, **(B)**performance statuses, and **(C)** ISS stages.


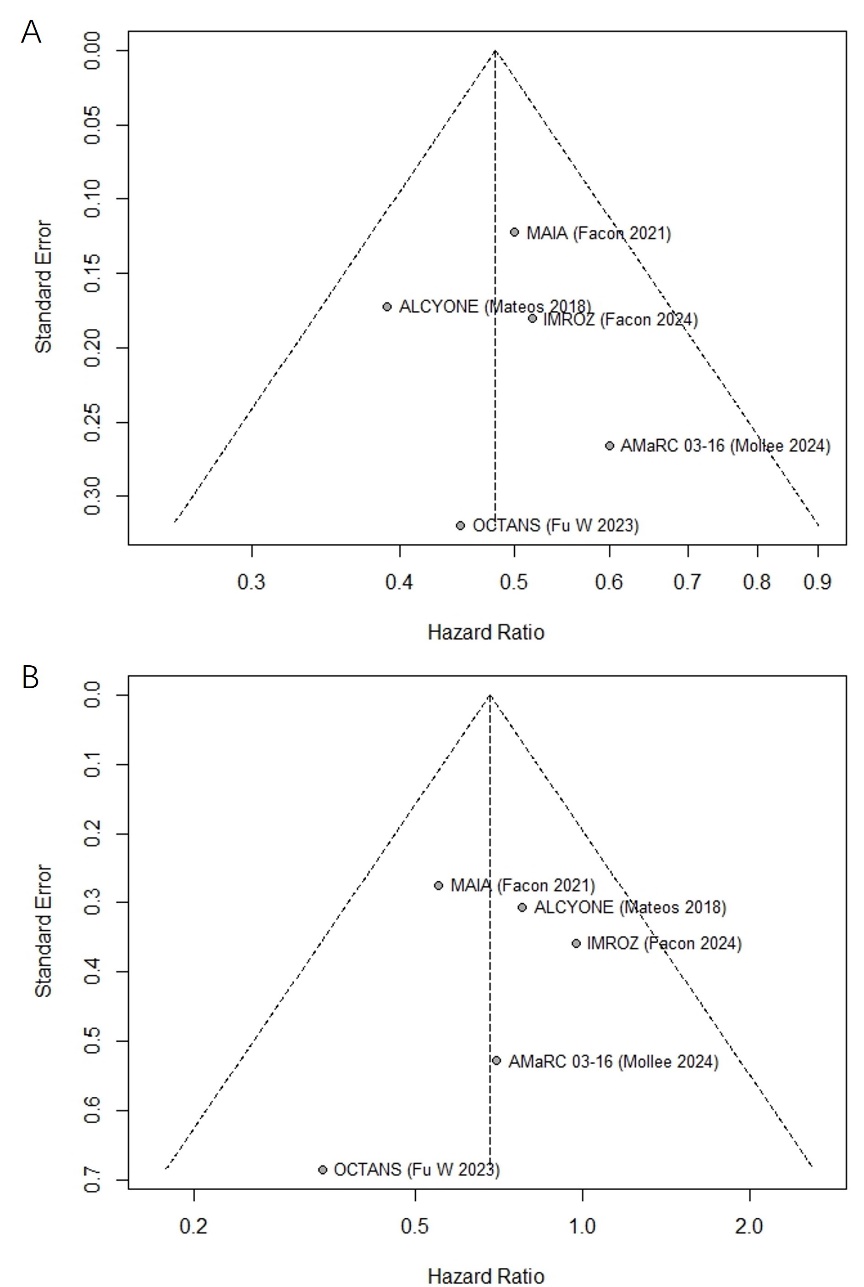


**Figure 5**. The funnel plot of PFS for TIE NDMM by subgroups of **(A)** SRMM and**(B)** HRMM.


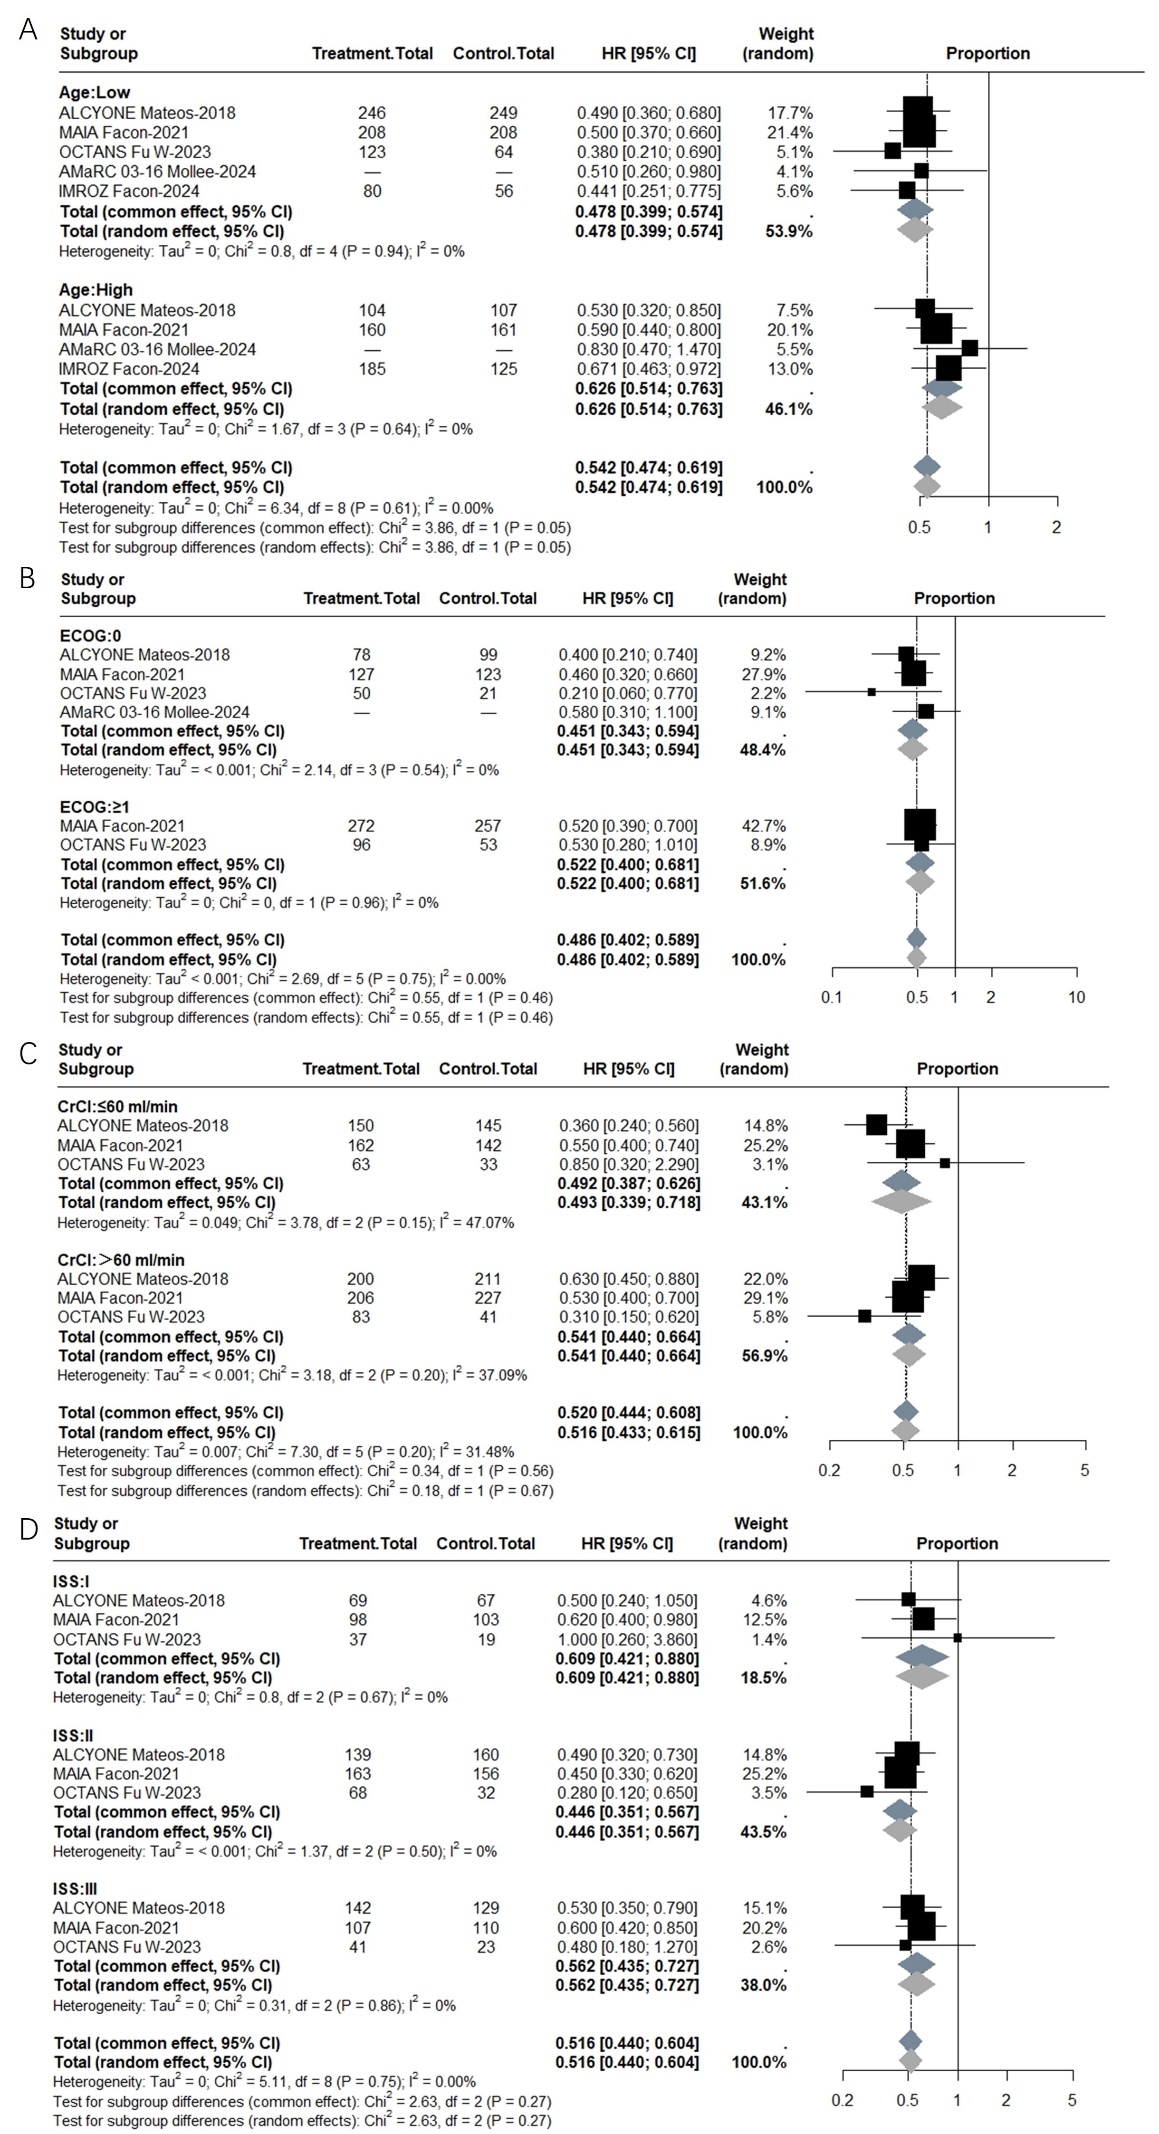


**Figure 6.** The meta-analysis of PFS for TIE NDMM by subgroups of **(A)** different age groups, **(B)**performance statuses, **(C)** creatinine clearance (CrCl) and **(D)** ISS stages.
